# Supplementary material for: Over-Expression of the Cell-Cycle Gene LaCDKB1;2 Promotes Cell Proliferation and the Formation of Normal Cotyledonary Embryos during Larix kaempferi Somatic Embryogenesis
Source: MDPI journal article supplement (doi:10.3390/genes12091435), 2021-09-17
Supplement: s1 [file s1]

**Table S1.** The mediums used in *L. keampferi* somatic embryogenesis

| Medium               | Basal medium | Glutamine (mg/L) | Inositol (mg/L) | 2,4-D (mg/L) | BA (mg/L) | Casein hydrolysate (mg/L) | PEG4000 (mg/L) | ABA (mg/L) |
|----------------------|--------------|------------------|-----------------|--------------|-----------|---------------------------|----------------|------------|
| Induction medium     | S            | 450              | 1000            | 2.2          | 0.8       | 500                       |                |            |
| Proliferation medium | S+B          | 450              | 1000            | 0.11         | 0.04      | 500                       |                |            |
| Maturation medium    | S+B          | 450              | 100             |              |           | 500                       | 110            | 42         |

Note: S: S basal medium (Ewald et al., 1995); S + B: S + B basal medium (Ewald et al., 1997)

**Table S2** Promoter elements of *LaCDKB1;2*

| Name                 | Organism                    | Position | Sequence                        | Function                                                             |
|----------------------|-----------------------------|----------|---------------------------------|----------------------------------------------------------------------|
| ABRE                 | <i>Arabidopsis thaliana</i> | 1167     | ACGTG                           | cis-acting element involved in responsiveness to abscisic acid       |
| CAT-box              |                             | 975      | GCCACT                          | cis-acting regulatory element related to meristem expression         |
| GT1-motif            |                             | 873      | GGTTAA                          | light-responsive element                                             |
| MYB recognition site |                             | 1141     | CCGTTG                          |                                                                      |
| TGA-element          | <i>Brassica oleracea</i>    | 882      | AACGAC                          | auxin-responsive element                                             |
| MSA-like             | <i>Catharanthus roseus</i>  | 1517     | (T/C)C(T/C)AAC<br>GG(T/C)(T/C)A | cis-acting element involved in cell-cycle regulation                 |
| CCAAT-box            | <i>Hordeum vulgare</i>      | 1141     | CAACGG                          | MYBHv1 binding site                                                  |
| TGACG-motif          |                             | 565      | TGACG                           | cis-acting regulatory element involved in MeJA-responsiveness        |
| CAAT-box             | <i>Nicotiana glutinosa</i>  | 29       | CAAT-box                        | common cis-acting element found in promoter and enhancer regions     |
| TC-rich repeats      |                             | 1290     | GTTTTCTTAC                      | cis-acting element involved in defense and stress responsiveness     |
| Sp1                  | <i>Oryza sativa</i>         | 721      | GGGCGG                          | light-responsive element                                             |
| TATC-box             |                             | 756      | TATCCCA                         | cis-acting element involved in responsiveness to gibberellin         |
| Box-II               | <i>Petroselinum crispum</i> | 1410     | CCACGTGGC                       | part of a light-responsive element                                   |
| A-box                |                             | 1065     | CCGTCC                          | cis-acting regulatory element                                        |
| TCCC-motif           | <i>Spinacia oleracea</i>    | 1400     | TCTCCCT                         | part of a light-responsive element                                   |
| G-box                | <i>Zea mays</i>             | 1166     | CACGTC                          | cis-acting regulatory element involved in light responsiveness       |
| O2-site              |                             | 1115     | GATGATGTGG                      | cis-acting regulatory element involved in regulating zein metabolism |

**Figure S1**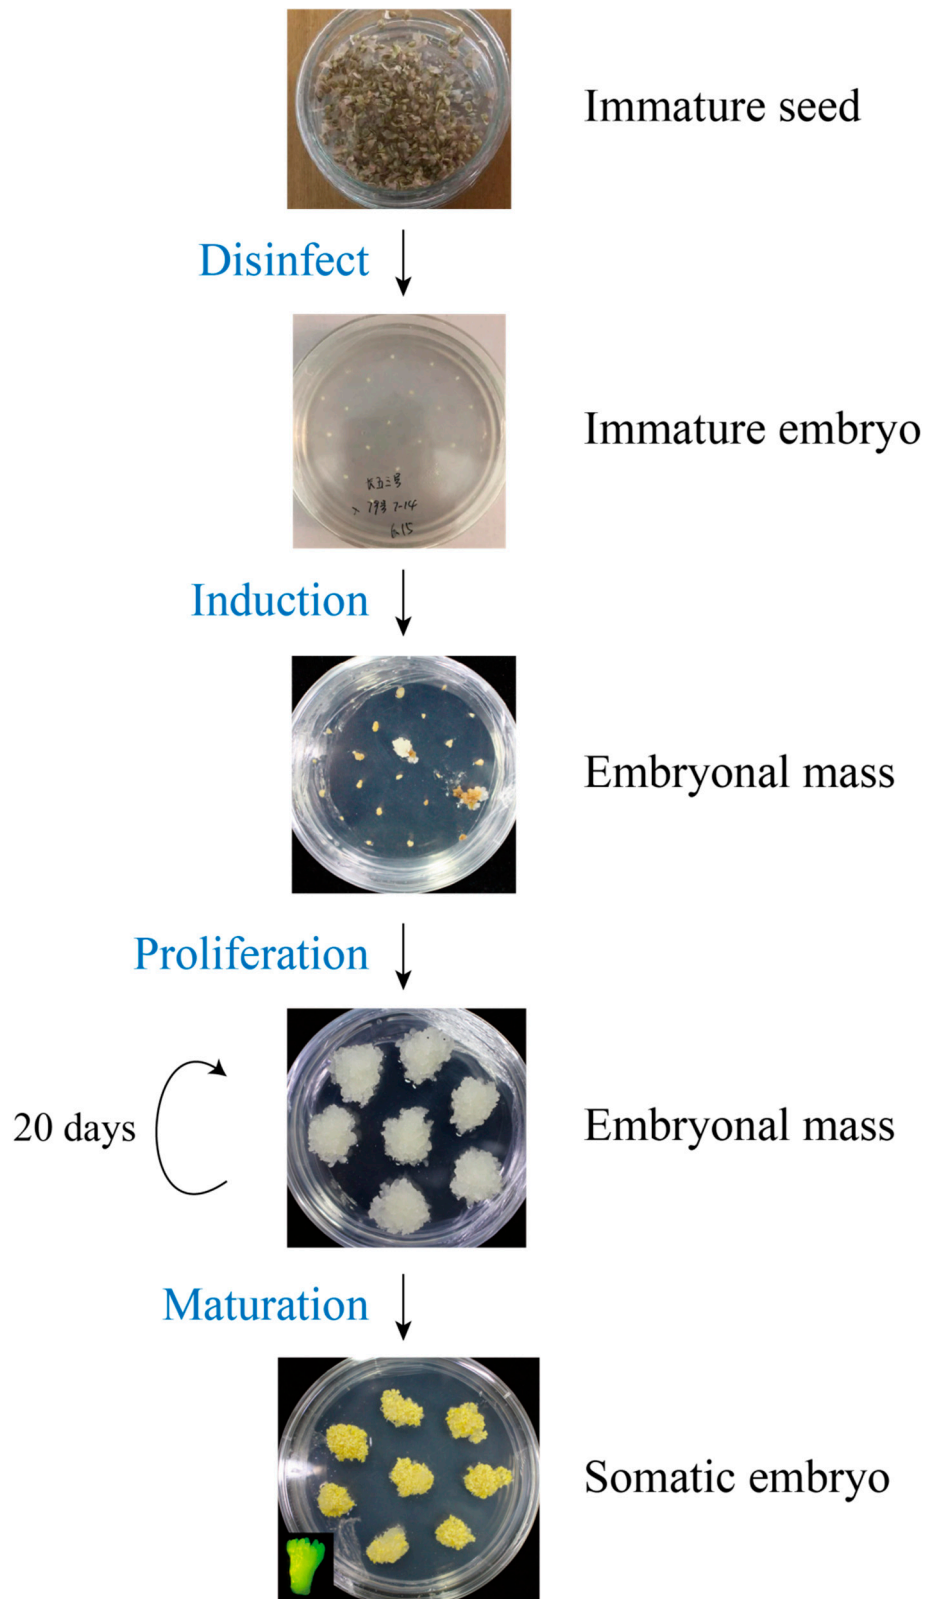**Figure S1.** The flow diagram of *L. keampferi* somatic embryos

**Figure S2**

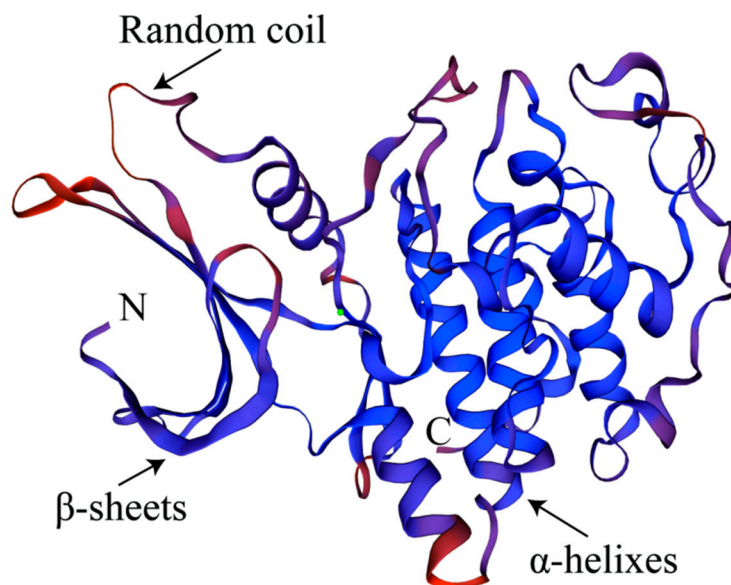

**Figure S2.** The tertiary structure of the LaCDKB1;2 protein. N: N-terminal region of the LaCDKB1;2 sequence; C: C-terminal region of the LaCDKB1;2 sequence

**Figure S3**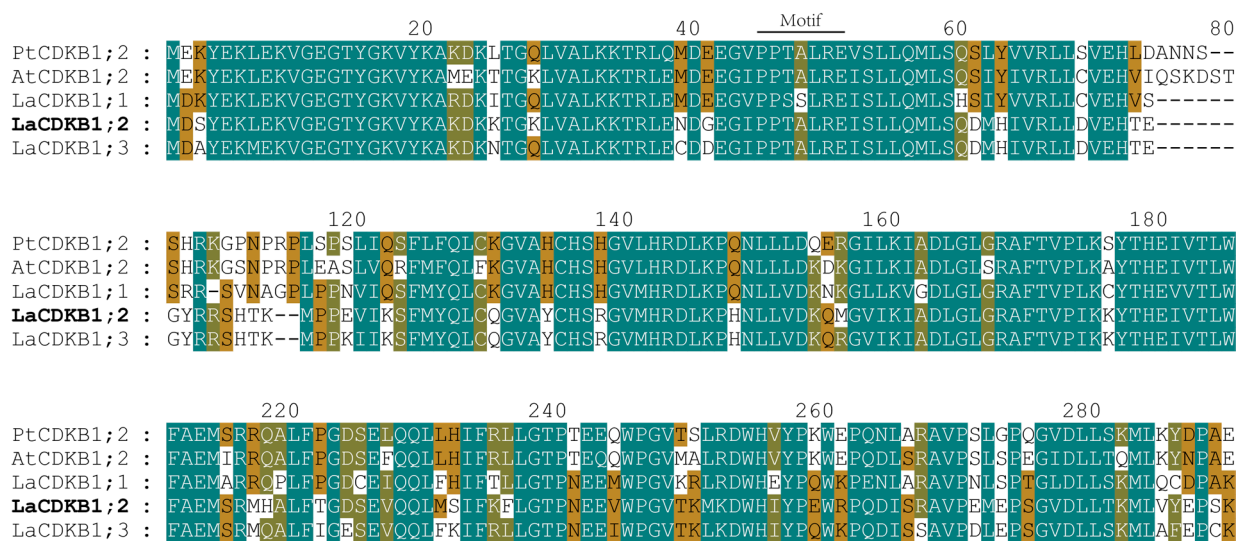**Figure S3.** Sequence alignment of the amino-acid sequence deduced for *L. kaempferi* CDKs (*LaCDKB1;1*, MW132640; *LaCDKB1;2*, MW132641; *LaCDKB1;3*, MW132642) with *A. thaliana* CDKB1;2 (*AtCDKB1;2*, AJ297937), and *P. trichocarpa* CDKB1;2 (*PtCDKB*, U5FL09). line: PPTALRE motif

Figure S4

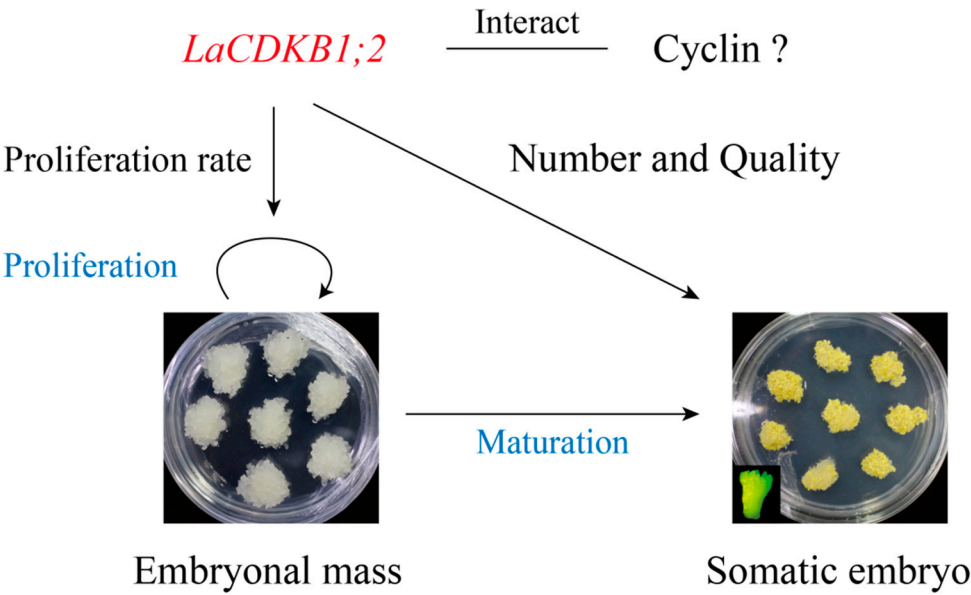

Figure S4. A working model for *LaCDKB1;2* in *L. kaempferi* somatic embryogenesis

## Data S1

The sequence of *LaCDKB1;2* (MW132641):

>*LaCDKB1;2*

```
ATGGACTCATATGAGAACTGGAGAAGGTGGGAGAAGGAACCTATGGGAAGGTG-
TACAAAGGCCAAGGACAAGAAAACAGGGAACTGGTCGCCCTTAAAAAGACCAGGCTAGA-
GAACGATGGTGAGGGAATTCCTCCAACCTGCTCTCCGTGAGATTTCTCTCCTG-
CAGATGCTTTCTCAAGATATGCACATTGTAAGGCTGTTGGATGTGGAACACACTGAGAACAA-
GAAGGGGAAGACCTTCTGTACTTGGTTTTTGAATTCATGGACTCTGATCTCAAGAA-
GCACATCGACGGTTATCGCCGCAGCCACACAAAAATGCCTCCCGAGGTTATCAA-
GAGCTTCATGTACCAGTTGTGCCAGGGGGTTGCTTACTGCCACAG-
TCGCGGTGTGATGCACAGGGACTTGAAGCCTCACAACTGCTGGTGGACAA-
GCAATGGGTGTGATAAAAAATAGCAGATCTTGGCCTGGGAAGGGCTTTCACAGTTCC-
TATCAAGAAGTACACTCACGAGATTGTGACCCCTTGGTACAGGGCTCCTGAAGTGCTCTT-
GGGGGCTACTACTACTCCACACCTGTTGACATTTGGTCTGTTGGCTGTATATT-
GCTGAAATGTCCAGAATGCATGCTCTGTTCACTGGAGATTCTGAAGTACAACAACTCATGAG-
CATTTTCAAGTTTTTAGGAACTCCTAATGAAGAAGTATGGCCAGGAG-
TGACTAAAATGAAGGATTGGCATATCTATCCAGAGTGGAGGCCTCAAGATA-
TAAGTCGTGCTGTTCCAGAAATGGAACCAAGTGGTGTAGATCTGTT-
GACTAAAATGCTGGTTTATGAGCCATCGAAGAGAATCTCAGCTAAGAAGGCATT-
CGAAGATCCTTATTTGAGCCCTTGATAAAATCTCAATTCTGA*
```

>*LaCDKB1;2*

```
MDSYEKLEKVGEGTYGKVYKAKDKKTGKLVALKKTRLENDGEGIPPTALREISLLQMLSQDM-
HIVRLLDVEHTENKKGKTLLEYLVEFEFMDSDLKKHIDGYRRSHTKMPPEVIKS-
FMYQLCQGVAYCHSRGVMHRDLKPHNLLVDKQMGVIKIADLGLGRAFTVPIK-
KYTHEIVTLWYRAPEVLLGATHYSTPVDIWSVGCIFAEMSRMHALFT-
GDSEVQQLMSIFKFLGTPNEEVWPGVTKMKDWHIYPEWRPQDISRAVPE-
MEPSGVDLLTKMLVYEPSKRISAKKALQHPYFDDLDKSQF*
```
